# Supplementary material for: DURATION-1: Exenatide Once Weekly Produces Sustained Glycemic Control and Weight Loss Over 52 Weeks
Source: Oxford University Press journal article supplement (doi:10.2337/dc09-1914), 2010-03-09

**Appendix Table 1: Treatment-emergent incidence of hypoglycemia during open-ended assessment period (week 30 through week 52)**

| <b>Hypoglycemia</b> |                                   |                                |                              |                                |
|---------------------|-----------------------------------|--------------------------------|------------------------------|--------------------------------|
|                     | <b>Non SFU background (n=159)</b> |                                | <b>SFU background (n=99)</b> |                                |
|                     | Exenatide QW                      | Exenatide BID→<br>Exenatide QW | Exenatide QW                 | Exenatide BID→<br>Exenatide QW |
|                     | N=79                              | N=80                           | N=49                         | N=50                           |
| Major (%)           | 0                                 | 0                              | 0                            | 0                              |
| Minor (%)           | 0                                 | 0                              | 10.2                         | 8.0                            |

**Appendix Table 2: Observed Antibody Titer**

|                            | <b>Observed Antibody Titer</b> |                  |          |                   |        |         |
|----------------------------|--------------------------------|------------------|----------|-------------------|--------|---------|
|                            | <b>Not detectable</b>          | <b>Low Titer</b> |          | <b>High Titer</b> |        |         |
|                            |                                | 1/25             | 1/125    | 1/625             | 1/3125 | 1/15625 |
| <b>Day 1</b>               |                                |                  |          |                   |        |         |
| Exenatide QW-only (n=146)  | 144 (99%)                      | 2 (1%)           | 0        | 0                 | 0      | 0       |
| Exenatide BID (n=144)      | 140 (97%)                      | 4 (3%)           | 0        | 0                 | 0      | 0       |
| <b>Week 30</b>             |                                |                  |          |                   |        |         |
| Exenatide QW-only (n=127)  | 62 (49%)                       | 37 (29%)         | 21 (17%) | 5 (4%)            | 2 (2%) | 0       |
| Exenatide BID (n=130)      | 94 (72%)                       | 27 (21%)         | 7 (5%)   | 1 (1%)            | 1 (1%) | 0       |
| <b>Week 52</b>             |                                |                  |          |                   |        |         |
| Exenatide QW-only (n=119)  | 65 (55%)                       | 29 (24%)         | 14 (12%) | 6 (5%)            | 2 (2%) | 3 (3%)  |
| Exenatide BID → QW (n=121) | 75 (62%)                       | 29 (24%)         | 13 (11%) | 3 (2%)            | 1 (1%) | 0       |

Percentages may not add up to 100% due to rounding.

**Appendix Figure 1.** LSmean change from baseline A1C in patients with baseline A1C <9% or ≥ 9%.

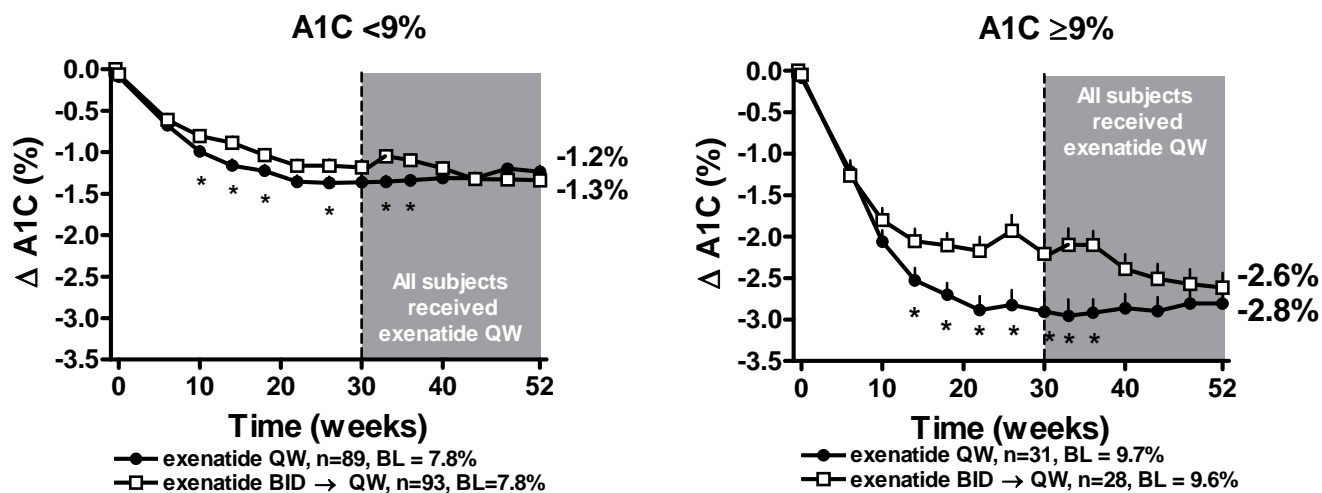

**Appendix Figure 2.** A1C reduction following 52 weeks of treatment was similar among patients regardless of weight loss. BL = Baseline

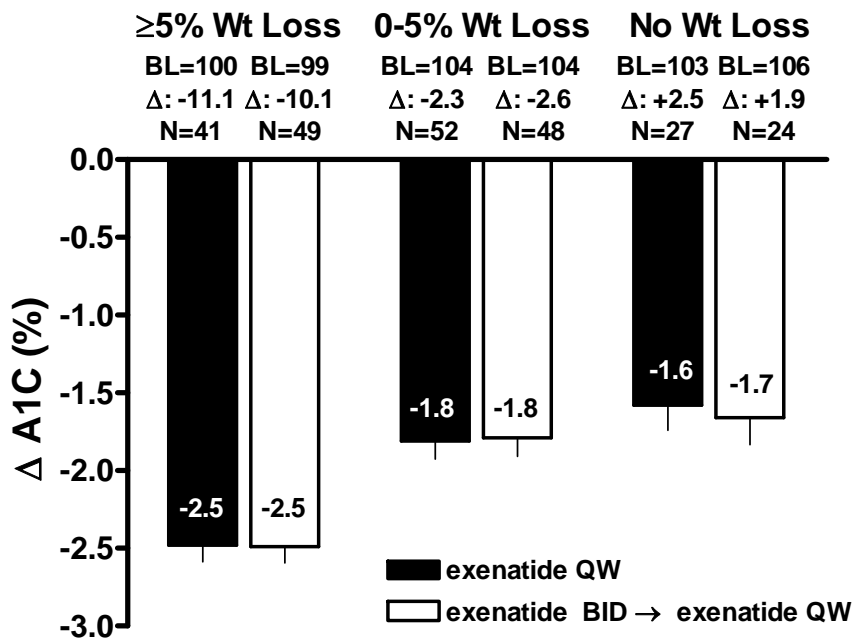

Supplement: dc091914-sup-onlineappendix.pdf [file dc091914-sup-onlineappendix.pdf]
